# Supplementary material for: Detection and Control of Dermatophytosis in Wild European Hedgehogs (Erinaceus europaeus) Admitted to a French Wildlife Rehabilitation Centre
Source: PubMed Central journal article supplement (PMC7911743; doi:10.3390/jof7020074), 2021-01-21
Supplement: jof-07-00074-s001.pdf [file jof-07-00074-s001.pdf]

**Supplementary Data.**

**Table S1:** European hedgehogs (*Erinaceus europaeus*) admitted at the rescue centre (ChuvFS Alfort) during 2016 and sampled for dermatophyte detection.

| N° | ID  | Date of arrival | Postal code | Outcome | Weight at arrival (g) | Sex    | Skin lesions | 1st sampling date | Sample ID | 1st diagnosis | N° of samplings |
|----|-----|-----------------|-------------|---------|-----------------------|--------|--------------|-------------------|-----------|---------------|-----------------|
| 1  | 40  | 17/01/2016      | 93160       | R       | 550                   | female | no           | 17/01/2016        | T256      | negative      | 1               |
| 2  | 64  | 12/07/2016      | 77400       | D       | NA                    | NA     | no           | 25/01/2016        | T224      | negative      | 1               |
| 3  | 86  | 13/07/2016      | 60940       | R       | 154                   | female | no           | 01/02/2016        | T254      | negative      | 1               |
| 4  | 122 | 13/07/2016      | 60940       | R       | 177                   | female | no           | 13/02/2016        | T255      | negative      | 1               |
| 5  | 123 | 13/07/2016      | 78340       | D       | 585                   | female | no           | 13/02/2016        | T258      | positive      | 2               |
| 6  | 186 | 03/09/2016      | NA          | R       | 145                   | male   | no           | 04/03/2016        | T311      | negative      | 2               |
| 7  | 216 | 03/09/2016      | NA          | R       | 315                   | male   | no           | 11/03/2016        | T412      | positive      | 1               |
| 8  | 281 | 01/02/2016      | 94800       | D       | 319                   | female | no           | 25/03/2016        | T413      | positive      | 3               |
| 9  | 296 | 01/05/2016      | 95260       | R       | 1711                  | NA     | yes          | 29/03/2016        | T450      | negative      | 2               |
| 10 | 300 | 01/07/2016      | 77185       | D       | 540                   | female | no           | 30/03/2016        | T449      | negative      | 2               |
| 11 | 319 | 01/09/2016      | 94000       | D       | 133                   | female | no           | 03/04/2016        | T446      | negative      | 1               |
| 12 | 320 | 01/12/2016      | 78640       | E       | 291                   | female | no           | 03/04/2016        | T447      | negative      | 1               |
| 13 | 322 | 02/05/2016      | 95100       | D       | 511                   | male   | no           | 03/04/2016        | T445      | negative      | 1               |
| 14 | 324 | 02/06/2016      | 92700       | D       | 402                   | male   | no           | 04/04/2016        | T444      | negative      | 2               |
| 15 | 364 | 02/07/2016      | 78840       | R       | 68                    | NA     | no           | 08/04/2016        | T493      | negative      | 1               |
| 16 | 388 | 02/07/2016      | 78840       | D       | 70                    | NA     | no           | 12/04/2016        | T494      | negative      | 1               |
| 17 | 390 | 02/07/2016      | 95640       | D       | 111                   | NA     | no           | 12/04/2016        | T508      | negative      | 1               |
| 18 | 393 | 02/07/2016      | 95640       | D       | 112                   | NA     | no           | 13/04/2016        | T507      | negative      | 1               |
| 19 | 403 | 02/07/2016      | 95640       | R       | 127                   | male   | no           | 15/04/2016        | T519      | negative      | 2               |
| 20 | 404 | 02/07/2016      | 93160       | D       | 156                   | NA     | no           | 15/04/2016        | T520      | negative      | 2               |
| 21 | 415 | 02/07/2016      | 93360       | R       | 629                   | female | no           | 17/04/2016        | T521      | negative      | 1               |
| 22 | 418 | 02/08/2016      | 75019       | D       | 477                   | female | no           | 18/04/2016        | T576      | positive      | 1               |
| 23 | 427 | 02/09/2016      | 77163       | D       | 193                   | male   | no           | 19/04/2016        | T572      | negative      | 1               |
| 24 | 441 | 02/09/2016      | 77860       | E       | NA                    | NA     | no           | 22/04/2016        | T574      | negative      | 2               |
| 25 | 446 | 02/10/2016      | 78500       | NA      | 154                   | NA     | no           | 23/04/2016        | T573      | negative      | 2               |
| 26 | 454 | 02/10/2016      | 94170       | D       | 373                   | NA     | no           | 25/04/2016        | T575      | positive      | 3               |
| 27 | 472 | 02/11/2016      | 94170       | D       | 330                   | male   | no           | 26/04/2016        | T612      | negative      | 1               |
| 28 | 489 | 02/12/2016      | NA          | D       | 300                   | female | no           | 28/04/2016        | T613      | positive      | 2               |
| 29 | 501 | 03/03/2016      | 91400       | R       | 651                   | male   | no           | 29/04/2016        | T614      | positive      | 1               |
| 30 | 503 | 03/04/2016      | 77680       | D       | 260                   | NA     | no           | 29/04/2016        | T615      | positive      | 1               |
| 31 | 530 | 03/04/2016      | 94190       | R       | 472                   | NA     | no           | 01/05/2016        | T618      | positive      | 2               |
| 32 | 533 | 03/04/2016      | 94800       | D       | 758                   | female | no           | 02/05/2016        | T620      | negative      | 1               |
| 33 | 555 | 03/05/2016      | 94260       | D       | 387                   | female | no           | 03/05/2016        | T634      | negative      | 1               |
| 34 | 582 | 03/06/2016      | 94410       | E       | NA                    | NA     | no           | 06/05/2016        | T635      | negative      | 1               |
| 35 | 606 | 03/07/2016      | 95570       | D       | 73                    | NA     | no           | 08/05/2016        | T657      | negative      | 1               |
| 36 | 616 | 03/07/2016      | NA          | R       | 119                   | male   | no           | 08/05/2016        | T656      | negative      | 1               |
| 37 | 656 | 03/07/2016      | 91300       | D       | 202                   | NA     | no           | 12/05/2016        | T736      | positive      | 2               |
| 38 | 671 | 03/08/2016      | 92170       | R       | 203                   | female | no           | 13/05/2016        | T733      | negative      | 2               |
| 39 | 675 | 03/08/2016      | 91330       | E       | 720                   | female | no           | 14/05/2016        | T739      | negative      | 1               |
| 40 | 715 | 03/08/2016      | 91330       | E       | NA                    | female | no           | 15/05/2016        | T735      | negative      | 1               |

| N° | ID   | Date of arrival | Postal code | Outcome | Weight at arrival (g) | Sex    | Skin lesions | 1st sampling date | Sample ID | 1st diagnosis | N° of samplings |
|----|------|-----------------|-------------|---------|-----------------------|--------|--------------|-------------------|-----------|---------------|-----------------|
| 41 | 763  | 03/09/2016      | 94000       | NA      | 116                   | female | no           | 17/05/2016        | T742      | negative      | 1               |
| 42 | 766  | 03/09/2016      | 77600       | NA      | 143                   | NA     | no           | 18/05/2016        | T745      | negative      | 1               |
| 43 | 769  | 03/09/2016      | 94500       | D       | 190                   | female | no           | 18/05/2016        | T741      | negative      | 1               |
| 44 | 818  | 03/09/2016      | 92320       | R       | 722                   | male   | no           | 21/05/2016        | T732      | negative      | 2               |
| 45 | 832  | 03/10/2016      | 94130       | NA      | 157                   | female | yes          | 22/05/2016        | T747      | negative      | 1               |
| 46 | 873  | 03/11/2016      | NA          | D       | juvenile              | male   | no           | 24/05/2016        | T804      | positive      | 4               |
| 47 | 894  | 03/12/2016      | 94350       | D       | 272                   | male   | no           | 25/05/2016        | T807      | positive      | 1               |
| 48 | 926  | 03/12/2016      | 77560       | NA      | 816                   | female | no           | 28/05/2016        | T803      | negative      | 1               |
| 49 | 987  | 04/04/2016      | 94360       | R       | 1089                  | male   | no           | 31/05/2016        | T800      | negative      | 1               |
| 50 | 1017 | 04/06/2016      | 94370       | D       | 565                   | male   | no           | 03/06/2016        | T798      | negative      | 2               |
| 51 | 1048 | 04/06/2016      | 92160       | NA      | 835                   | male   | no           | 03/06/2016        | T799      | negative      | 1               |
| 52 | 1067 | 04/07/2016      | 78260       | D       | 128                   | male   | no           | 04/06/2016        | T806      | negative      | 7               |
| 53 | 1069 | 04/08/2016      | 94500       | R       | 175                   | male   | no           | 04/06/2016        | T797      | negative      | 1               |
| 54 | 1092 | 04/09/2016      | NA          | D       | 310                   | NA     | no           | 06/06/2016        | T823      | negative      | 5               |
| 55 | 1093 | 04/10/2016      | 77220       | D       | 324                   | male   | no           | 06/06/2016        | T825      | negative      | 1               |
| 56 | 1107 | 04/11/2016      | 95180       | D       | 188                   | female | no           | 07/06/2016        | T824      | negative      | 5               |
| 57 | 1117 | 04/11/2016      | 78960       | D       | 272                   | female | no           | 07/06/2016        | T826      | negative      | 1               |
| 58 | 1131 | 04/11/2016      | 78960       | NA      | 325                   | male   | no           | 08/06/2016        | T827      | negative      | 6               |
| 59 | 1141 | 04/11/2016      | 94130       | NA      | 541                   | female | yes          | 08/06/2016        | T829      | negative      | 1               |
| 60 | 1163 | 04/12/2016      | 94170       | D       | 504                   | female | yes          | 09/06/2016        | T830      | positive      | 1               |
| 61 | 1203 | 05/08/2016      | 78130       | R       | 57                    | male   | no           | 11/06/2016        | T865      | positive      | 7               |
| 62 | 1209 | 05/08/2016      | 93130       | E       | 70                    | male   | no           | 11/06/2016        | T867      | negative      | 5               |
| 63 | 1210 | 05/08/2016      | 93130       | D       | 75                    | male   | no           | 13/06/2016        | T868      | negative      | 5               |
| 64 | 1211 | 05/09/2016      | 78670       | E       | 503                   | male   | no           | 13/06/2016        | T864      | positive      | 5               |
| 65 | 1212 | 05/09/2016      | 92160       | R       | 703                   | male   | yes          | 11/06/2016        | T866      | negative      | 1               |
| 66 | 1235 | 05/10/2016      | 78180       | D       | 74                    | female | no           | 13/06/2016        | T863      | positive      | 5               |
| 67 | 1268 | 06/05/2016      | 28100       | D       | 600                   | female | no           | 13/06/2016        | T861      | negative      | 1               |
| 68 | 1269 | 06/06/2016      | 92230       | R       | 212                   | NA     | no           | 13/06/2016        | T859      | negative      | 1               |
| 69 | 1270 | 06/06/2016      | 75018       | D       | NA                    | NA     | no           | 13/06/2016        | T860      | negative      | 1               |
| 70 | 1273 | 06/07/2016      | 94300       | D       | 123                   | female | no           | 14/06/2016        | T882      | negative      | 1               |
| 71 | 1281 | 06/07/2016      | 78500       | D       | 196                   | NA     | yes          | 15/06/2016        | T881      | negative      | 1               |
| 72 | 1313 | 06/07/2016      | 94240       | D       | 200                   | female | no           | 13/06/2016        | T899      | negative      | 2               |
| 73 | 1320 | 06/07/2016      | 94350       | D       | 276                   | NA     | no           | 18/06/2016        | T898      | negative      | 2               |
| 74 | 1341 | 06/07/2016      | 94500       | R       | 668                   | NA     | no           | 19/06/2016        | T900      | negative      | 1               |
| 75 | 1347 | 06/08/2016      | 92220       | R       | 110                   | female | no           | 20/06/2016        | T906      | negative      | 2               |
| 76 | 1348 | 06/08/2016      | 94210       | E       | 872                   | female | yes          | 19/06/2016        | T897      | positive      | 1               |
| 77 | 1349 | 06/09/2016      | 91190       | D       | 130                   | female | no           | 19/06/2016        | T901-1    | positive      | 5               |
| 78 | 1352 | 06/09/2016      | 93110       | E       | NA                    | male   | no           | 19/06/2016        | T896      | negative      | 1               |
| 79 | 1354 | 06/10/2016      | 92230       | D       | 194                   | female | no           | 19/06/2016        | T908      | negative      | 1               |
| 80 | 1362 | 06/11/2016      | 77380       | NA      | 224                   | female | no           | 19/06/2016        | T901-2    | negative      | 2               |
| 81 | 1363 | 06/11/2016      | 77100       | R       | 406                   | male   | no           | 19/06/2016        | T901-3    | negative      | 3               |
| 82 | 1364 | 06/12/2016      | 92160       | NA      | 302                   | female | no           | 20/06/2016        | T910      | positive      | 1               |
| 83 | 1376 | 06/12/2016      | 91460       | D       | 467                   | NA     | no           | 20/06/2016        | T911      | negative      | 1               |
| 84 | 1390 | 06/12/2016      | 28130       | E       | juvenile              | female | no           | 21/06/2016        | T909      | negative      | 4               |

| N°  | ID   | Date of arrival | Postal code | Outcome | Weight at arrival (g) | Sex    | Skin lesions | 1st sampling date | Sample ID | 1st diagnosis | N° of samplings |
|-----|------|-----------------|-------------|---------|-----------------------|--------|--------------|-------------------|-----------|---------------|-----------------|
| 85  | 1405 | 07/06/2016      | 77400       | D       | 51                    | NA     | no           | 22/06/2016        | T925      | negative      | 1               |
| 86  | 1406 | 07/06/2016      | NA          | R       | 104                   | female | no           | 22/06/2016        | T926      | negative      | 1               |
| 87  | 1410 | 07/07/2016      | 94380       | D       | 80                    | NA     | no           | 06/07/2016        | T932      | negative      | 2               |
| 88  | 1431 | 07/07/2016      | 78670       | D       | 363                   | NA     | no           | 23/06/2016        | T929      | negative      | 1               |
| 89  | 1432 | 07/07/2016      | 78960       | R       | 365                   | female | no           | 23/06/2016        | T930      | negative      | 1               |
| 90  | 1438 | 07/07/2016      | 92340       | D       | 471                   | NA     | no           | 23/06/2016        | T928      | positive      | 5               |
| 91  | 1449 | 07/10/2016      | 95880       | NA      | 315                   | female | no           | 23/06/2016        | T927      | negative      | 1               |
| 92  | 1454 | 07/11/2016      | 91179       | D       | juvenile              | male   | yes          | 24/06/2016        | T955      | negative      | 4               |
| 93  | 1459 | 08/04/2016      | 92210       | D       | 1000                  | male   | no           | 24/06/2016        | T953      | positive      | 5               |
| 94  | 1460 | 08/05/2016      | 93440       | D       | 647                   | male   | no           | 24/06/2016        | T952      | positive      | 5               |
| 95  | 1461 | 08/05/2016      | NA          | E       | 720                   | male   | no           | 24/06/2016        | T951      | positive      | 5               |
| 96  | 1466 | 08/06/2016      | 92210       | D       | 91                    | NA     | no           | 24/06/2016        | T954      | negative      | 1               |
| 97  | 1471 | 08/06/2016      | 95470       | NA      | 119                   | NA     | no           | 24/06/2016        | T948      | negative      | 3               |
| 98  | 1472 | 08/07/2016      | 91200       | R       | 90                    | female | no           | 24/06/2016        | T949      | negative      | 3               |
| 99  | 1473 | 08/07/2016      | 91200       | D       | 98                    | male   | no           | 24/06/2016        | T950      | positive      | 5               |
| 100 | 1480 | 08/08/2016      | NA          | D       | 28                    | female | no           | 24/06/2016        | T947      | negative      | 1               |
| 101 | 1485 | 08/08/2016      | 95240       | D       | 127                   | male   | no           | 24/06/2016        | T946      | negative      | 1               |
| 102 | 1492 | 08/08/2016      | 95240       | R       | 135                   | female | no           | 25/06/2016        | T956      | negative      | 3               |
| 103 | 1493 | 08/08/2016      | 95240       | E       | 146                   | male   | no           | 25/06/2016        | T957      | negative      | 1               |
| 104 | 1494 | 08/09/2016      | 94700       | D       | 257                   | male   | no           | 25/06/2016        | T958      | negative      | 1               |
| 105 | 1497 | 08/11/2017      | 94000       | D       | 208                   | female | no           | 25/06/2016        | T959      | negative      | 1               |
| 106 | 1502 | 09/06/2016      | 94260       | D       | NA                    | NA     | no           | 26/06/2016        | T960      | negative      | 3               |
| 107 | 1505 | 09/07/2016      | 93100       | D       | 70                    | female | no           | 26/06/2016        | T961      | negative      | 1               |
| 108 | 1506 | 09/07/2016      | 95580       | D       | 77                    | female | no           | 26/06/2016        | T962      | negative      | 3               |
| 109 | 1510 | 09/07/2016      | 95580       | D       | 79                    | male   | no           | 26/06/2016        | T963      | positive      | 5               |
| 110 | 1512 | 09/07/2016      | 92410       | D       | 200                   | female | no           | 26/06/2016        | T964      | positive      | 1               |
| 111 | 1516 | 09/07/2016      | NA          | R       | 308                   | male   | no           | 26/06/2016        | T967      | positive      | 3               |
| 112 | 1517 | 09/07/2016      | 93100       | E       | 529                   | female | no           | 26/06/2016        | T966      | negative      | 1               |
| 113 | 1530 | 09/09/2016      | NA          | D       | 60                    | female | no           | 26/06/2016        | T968      | negative      | 1               |
| 114 | 1531 | 09/09/2016      | 92000       | D       | NA                    | male   | no           | 26/06/2016        | T965      | negative      | 1               |
| 115 | 1532 | 09/10/2016      | 92330       | NA      | 135                   | male   | no           | 26/06/2016        | T979      | negative      | 2               |
| 116 | 1537 | 09/10/2016      | 77181       | D       | 217                   | male   | no           | 27/06/2016        | T986      | positive      | 1               |
| 117 | 1542 | 09/10/2016      | 78150       | E       | 530                   | male   | no           | 27/06/2016        | T984      | positive      | 1               |
| 118 | 1543 | 09/10/2016      | 94420       | E       | NA                    | female | no           | 27/06/2016        | T983      | negative      | 2               |
| 119 | 1544 | 09/10/2016      | 91600       | E       | NA                    | male   | no           | 27/06/2016        | T982      | negative      | 1               |
| 120 | 1545 | 09/12/2016      | NA          | D       | 242                   | female | no           | 27/06/2016        | T981      | positive      | 2               |
| 121 | 1546 | 09/12/2016      | NA          | D       | 288                   | female | no           | 27/06/2016        | T980      | positive      | 4               |
| 122 | 1548 | 09/12/2016      | NA          | D       | 331                   | female | no           | 27/06/2016        | T985      | negative      | 1               |
| 123 | 1589 | 10/07/2016      | 95880       | D       | 58                    | male   | no           | 29/06/2016        | T978      | positive      | 1               |
| 124 | 1590 | 10/07/2016      | 95880       | D       | 64                    | female | no           | 29/06/2016        | T1027     | negative      | 1               |
| 125 | 1596 | 10/08/2016      | 78370       | D       | 117                   | female | no           | 29/06/2016        | T1021     | negative      | 1               |
| 126 | 1597 | 10/08/2016      | 78370       | D       | 130                   | male   | yes          | 29/06/2016        | T1020     | negative      | 1               |
| 127 | 1599 | 10/08/2016      | 78370       | R       | 888                   | male   | no           | 30/06/2016        | T1025     | negative      | 1               |
| 128 | 1600 | 10/09/2016      | 92110       | E       | 1000                  | female | no           | 30/06/2016        | T1024     | negative      | 1               |

| N°  | ID   | Date of arrival | Postal code | Outcome | Weight at arrival (g) | Sex    | Skin lesions | 1st sampling date | Sample ID | 1st diagnosis | N° of samplings |
|-----|------|-----------------|-------------|---------|-----------------------|--------|--------------|-------------------|-----------|---------------|-----------------|
| 129 | 1601 | 10/10/2016      | 94130       | NA      | 266                   | male   | yes          | 30/06/2016        | T1023     | negative      | 1               |
| 130 | 1602 | 10/10/2016      | 94130       | D       | 298                   | female | yes          | 30/06/2016        | T1022     | negative      | 1               |
| 131 | 1606 | 10/10/2016      | 94130       | NA      | 303                   | female | yes          | 30/06/2016        | T1019     | negative      | 1               |
| 132 | 1624 | 10/10/2016      | 94130       | R       | 420                   | male   | no           | 01/07/2016        | T1026     | positive      | 1               |
| 133 | 1640 | 10/12/2016      | 94360       | D       | 339                   | male   | no           | 01/07/2016        | T1017     | negative      | 1               |
| 134 | 1658 | 10/12/2016      | 91160       | NA      | 459                   | female | no           | 02/07/2016        | T1016     | negative      | 1               |
| 135 | 1659 | 11/03/2016      | 78960       | D       | 689                   | male   | yes          | 02/07/2016        | T1015     | negative      | 1               |
| 136 | 1660 | 11/06/2016      | 75015       | NA      | 105                   | male   | no           | 02/07/2016        | T1014     | negative      | 3               |
| 137 | 1664 | 11/06/2016      | 95230       | R       | 120                   | male   | no           | 02/07/2017        | T1013     | negative      | 2               |
| 138 | 1678 | 11/06/2016      | NA          | R       | 121                   | female | no           | 02/07/2016        | T1012     | negative      | 1               |
| 139 | 1680 | 11/06/2016      | 95230       | R       | 125                   | female | no           | 02/07/2016        | T1010     | negative      | 3               |
| 140 | 1681 | 11/06/2016      | 92160       | D       | 387                   | female | no           | 02/07/2016        | T1011     | negative      | 1               |
| 141 | 1688 | 11/07/2016      | 95100       | D       | 73                    | female | no           | 03/07/2016        | T1009     | negative      | 3               |
| 142 | 1696 | 11/07/2016      | 77590       | D       | juvenile              | female | no           | 03/07/2016        | T1029     | negative      | 3               |
| 143 | 1702 | 11/07/2016      | 94370       | D       | NA                    | female | no           | 03/07/2016        | T1008     | negative      | 1               |
| 144 | 1708 | 11/09/2016      | 94120       | NA      | 142                   | female | no           | 04/07/2016        | T1038     | positive      | 1               |
| 145 | 1754 | 11/09/2016      | 94120       | D       | NA                    | NA     | no           | 07/07/2016        | T1074     | positive      | 1               |
| 146 | 1761 | 11/10/2016      | 95130       | D       | 127                   | female | no           | 06/07/2016        | T1078     | positive      | 1               |
| 147 | 1762 | 11/10/2016      | 94290       | D       | NA                    | NA     | no           | 06/07/2016        | T1076     | positive      | 1               |
| 148 | 1765 | 11/11/2016      | 60230       | D       | 120                   | NA     | no           | 06/07/2016        | T1077     | negative      | 1               |
| 149 | 1775 | 11/12/2016      | 77450       | NA      | 470                   | female | no           | 06/07/2016        | T1069     | negative      | 1               |
| 150 | 1780 | 12/04/2016      | 93160       | D       | 524                   | male   | no           | 07/07/2016        | T1080     | negative      | 1               |
| 151 | 1782 | 12/04/2016      | 51100       | E       | NA                    | female | no           | 07/07/2016        | T1072     | positive      | 1               |
| 152 | 1793 | 12/05/2016      | 75005       | E       | 557                   | NA     | yes          | 07/07/2016        | T1092     | positive      | 1               |
| 153 | 1795 | 12/06/2016      | NA          | R       | 121                   | male   | no           | 07/07/2016        | T1081     | negative      | 1               |
| 154 | 1809 | 12/07/2016      | 91160       | E       | 700                   | NA     | no           | 08/07/2016        | T1071     | positive      | 1               |
| 155 | 1810 | 12/07/2016      | 75017       | R       | 1020                  | male   | no           | 08/07/2016        | T1062     | negative      | 3               |
| 156 | 1819 | 12/07/2016      | 92220       | D       | NA                    | NA     | no           | 09/07/2016        | T1093     | negative      | 1               |
| 157 | 1820 | 12/08/2016      | NA          | R       | 127                   | male   | no           | 09/07/2016        | T1095     | positive      | 1               |
| 158 | 1821 | 12/08/2016      | 77380       | E       | NA                    | female | no           | 09/07/2016        | T1094     | positive      | 1               |
| 159 | 1828 | 12/09/2016      | 94400       | E       | 110                   | NA     | no           | 09/07/2016        | T1096     | negative      | 1               |
| 160 | 1829 | 12/09/2016      | 94400       | NA      | 116                   | NA     | no           | 09/07/2016        | T1082     | negative      | 1               |
| 161 | 1832 | 12/09/2016      | 94400       | D       | 121                   | female | no           | 09/07/2016        | T1067     | negative      | 2               |
| 162 | 1850 | 12/10/2016      | 77181       | D       | 223                   | male   | no           | 10/07/2016        | T1097     | negative      | 1               |
| 163 | 1851 | 12/10/2016      | 94800       | NA      | 230                   | male   | no           | 10/07/2016        | T1068     | positive      | 1               |
| 164 | 1865 | 12/10/2016      | 77120       | NA      | 274                   | NA     | no           | 10/07/2016        | T1083     | positive      | 1               |
| 165 | 1893 | 12/10/2016      | 95000       | D       | 284                   | female | yes          | 11/07/2016        | T1099     | negative      | 1               |
| 166 | 1894 | 12/10/2016      | NA          | D       | NA                    | NA     | no           | 11/07/2016        | T1101     | negative      | 1               |
| 167 | 1910 | 12/11/2016      | 78330       | NA      | 377                   | NA     | no           | 12/07/2016        | T1064     | negative      | 2               |
| 168 | 1914 | 12/11/2016      | 60500       | D       | 406                   | female | no           | 13/07/2016        | T1066     | positive      | 1               |
| 169 | 1915 | 13/02/2016      | 75018       | R       | 697                   | female | no           | 13/07/2016        | T1100     | negative      | 2               |
| 170 | 1916 | 13/02/2016      | 94140       | R       | 1001                  | male   | no           | 13/07/2016        | T1065     | negative      | 2               |
| 171 | 1917 | 13/04/2016      | 94350       | D       | 503                   | male   | no           | 13/07/2016        | T1079     | negative      | 1               |
| 172 | 1918 | 13/05/2016      | 94100       | R       | 830                   | male   | no           | 13/07/2016        | T1063     | positive      | 1               |

| N°  | ID   | Date of arrival | Postal code | Outcome | Weight at arrival (g) | Sex    | Skin lesions | 1st sampling date | Sample ID | 1st diagnosis | N° of samplings |
|-----|------|-----------------|-------------|---------|-----------------------|--------|--------------|-------------------|-----------|---------------|-----------------|
| 173 | 1927 | 13/06/2016      | 92410       | D       | 82                    | male   | no           | 14/07/2016        | T1139     | positive      | 1               |
| 174 | 1941 | 13/06/2016      | 78100       | D       | 150                   | NA     | no           | 14/07/2016        | T1138     | negative      | 1               |
| 175 | 1945 | 13/06/2016      | 78100       | D       | 172                   | male   | no           | 14/07/2016        | T1134     | negative      | 1               |
| 176 | 1946 | 13/06/2016      | 75012       | R       | 313                   | male   | no           | 14/07/2016        | T1137     | negative      | 1               |
| 177 | 1947 | 13/08/2016      | 95230       | D       | 100                   | female | no           | 14/07/2016        | T1136     | negative      | 1               |
| 178 | 1951 | 13/08/2016      | 95230       | R       | 108                   | NA     | no           | 15/07/2016        | T1135     | negative      | 2               |
| 179 | 1954 | 13/08/2016      | 95230       | D       | 126                   | male   | no           | 15/07/2016        | T1130     | positive      | 2               |
| 180 | 1955 | 13/08/2016      | 95230       | D       | 130                   | female | no           | 15/07/2016        | T1131     | negative      | 2               |
| 181 | 1957 | 13/08/2016      | 94440       | R       | 350                   | female | no           | 15/07/2016        | T1133     | negative      | 2               |
| 182 | 1958 | 13/08/2016      | 77200       | D       | 440                   | NA     | no           | 15/07/2016        | T1129     | negative      | 1               |
| 183 | 1962 | 13/08/2016      | NA          | D       | NA                    | NA     | yes          | 16/07/2016        | T1122     | negative      | 1               |
| 184 | 1990 | 13/10/2016      | 75012       | D       | 210                   | male   | no           | 17/07/2016        | T1126     | negative      | 3               |
| 185 | 1991 | 13/10/2016      | NA          | D       | 313                   | NA     | no           | 17/07/2016        | T1132     | negative      | 1               |
| 186 | 2003 | 13/11/2016      | 91080       | D       | 506                   | female | no           | 17/07/2016        | T1128     | negative      | 1               |
| 187 | 2011 | 14/05/2016      | 94700       | D       | 440                   | female | no           | 17/07/2016        | T1127     | negative      | 1               |
| 188 | 2014 | 14/06/2016      | 77090       | D       | 109                   | female | yes          | 18/07/2016        | T1125     | negative      | 1               |
| 189 | 2020 | 14/07/2016      | 95100       | D       | 120                   | female | no           | 18/07/2016        | T1124     | negative      | 1               |
| 190 | 2022 | 14/07/2016      | 94700       | D       | 385                   | female | no           | 18/07/2016        | T1123     | negative      | 1               |
| 191 | 2074 | 14/07/2016      | 94700       | D       | 483                   | male   | no           | 20/07/2016        | T1160     | negative      | 2               |
| 192 | 2085 | 14/07/2016      | 77370       | D       | NA                    | NA     | no           | 20/07/2016        | T1161     | negative      | 1               |
| 193 | 2096 | 14/09/2016      | 93420       | D       | 99                    | female | no           | 21/07/2016        | T1158     | negative      | 1               |
| 194 | 2106 | 14/09/2016      | 93420       | NA      | 103                   | female | no           | 21/07/2016        | T1159     | negative      | 1               |
| 195 | 2111 | 14/09/2016      | 93420       | NA      | 103                   | female | no           | 21/07/2016        | T1157     | positive      | 1               |
| 196 | 2158 | 14/10/2016      | 77170       | D       | 187                   | male   | no           | 25/07/2016        | T1188     | negative      | 2               |
| 197 | 2166 | 15/04/2016      | 77340       | R       | 854                   | female | no           | 25/07/2016        | T1190     | positive      | 4               |
| 198 | 2169 | 15/04/2016      | 77340       | R       | 1076                  | male   | no           | 25/07/2016        | T1189     | negative      | 2               |
| 199 | 2171 | 15/05/2016      | NA          | D       | 470                   | male   | no           | 25/07/2016        | T1185     | negative      | 2               |
| 200 | 2173 | 15/06/2016      | 94360       | D       | 335                   | NA     | no           | 26/07/2016        | T1186     | negative      | 1               |
| 201 | 2174 | 15/07/2016      | 95530       | R       | 130                   | female | no           | 26/07/2016        | T1187     | negative      | 1               |
| 202 | 2181 | 15/07/2016      | 94430       | R       | 221                   | female | no           | 25/07/2016        | T1184     | positive      | 4               |
| 203 | 2201 | 15/07/2016      | 92160       | R       | 680                   | female | no           | 26/07/2016        | T1183     | negative      | 1               |
| 204 | 2207 | 15/07/2016      | 77170       | R       | 953                   | female | no           | 27/07/2016        | T1182     | negative      | 1               |
| 205 | 2220 | 15/07/2016      | 78670       | D       | NA                    | female | no           | 27/07/2016        | T1180     | negative      | 1               |
| 206 | 2221 | 15/08/2016      | 77310       | E       | 10                    | NA     | yes          | 27/07/2016        | T1181     | negative      | 1               |
| 207 | 2222 | 15/08/2016      | 77310       | E       | 14                    | male   | yes          | 27/07/2016        | T1179     | negative      | 1               |
| 208 | 2225 | 15/08/2016      | 77310       | E       | 15                    | female | no           | 27/07/2016        | T1177     | negative      | 2               |
| 209 | 2236 | 15/09/2016      | 94440       | D       | 340                   | male   | no           | 28/07/2016        | T1178     | positive      | 1               |
| 210 | 2269 | 15/11/2016      | 78800       | D       | 421                   | female | no           | 01/08/2016        | T1229     | negative      | 3               |
| 211 | 2270 | 15/12/2016      | 78340       | NA      | 330                   | male   | no           | 01/08/2016        | T1228     | negative      | 3               |
| 212 | 2271 | 16/07/2016      | 91430       | D       | 528                   | male   | no           | 01/08/2016        | T1214     | negative      | 3               |
| 213 | 2272 | 16/08/2016      | 77750       | E       | NA                    | NA     | no           | 30/07/2016        | T1260     | negative      | 4               |
| 214 | 2274 | 16/09/2016      | 60100       | D       | 173                   | NA     | no           | 30/07/2016        | T1221     | negative      | 1               |
| 215 | 2295 | 16/10/2016      | 94000       | D       | 178                   | male   | no           | 31/07/2016        | T1223     | negative      | 2               |
| 216 | 2301 | 16/10/2016      | 77610       | D       | 218                   | female | no           | 31/07/2016        | T1224     | negative      | 1               |

| N°  | ID   | Date of arrival | Postal code | Outcome | Weight at arrival (g) | Sex    | Skin lesions | 1st sampling date | Sample ID | 1st diagnosis | N° of samplings |
|-----|------|-----------------|-------------|---------|-----------------------|--------|--------------|-------------------|-----------|---------------|-----------------|
| 217 | 2308 | 16/10/2016      | NA          | D       | 297                   | male   | no           | 31/07/2016        | T1225     | positive      | 1               |
| 218 | 2336 | 16/10/2016      | NA          | D       | 347                   | male   | no           | 02/08/2016        | T1261     | negative      | 1               |
| 219 | 2339 | 16/11/2016      | 77181       | D       | 253                   | male   | yes          | 03/08/2016        | T1263     | negative      | 2               |
| 220 | 2349 | 16/11/2016      | 77700       | D       | 278                   | male   | yes          | 03/08/2016        | T1252     | negative      | 1               |
| 221 | 2351 | 16/11/2016      | NA          | NA      | NA                    | NA     | yes          | 03/08/2016        | T1268     | negative      | 2               |
| 222 | 2358 | 17/04/2016      | 93270       | E       | 656                   | NA     | no           | 04/08/2016        | T1247     | negative      | 3               |
| 223 | 2361 | 17/05/2016      | 94700       | D       | 158                   | female | no           | 05/08/2016        | T1246     | negative      | 3               |
| 224 | 2363 | 17/07/2016      | 93250       | R       | 77                    | female | no           | 05/08/2016        | T1267     | negative      | 3               |
| 225 | 2371 | 17/07/2016      | 94310       | D       | 107                   | male   | no           | 05/08/2016        | T1259     | negative      | 1               |
| 226 | 2375 | 17/07/2016      | 91550       | D       | 152                   | NA     | no           | 06/08/2016        | T1258     | negative      | 1               |
| 227 | 2378 | 17/07/2016      | 77200       | D       | adult                 | NA     | no           | 06/08/2016        | T1257     | negative      | 3               |
| 228 | 2396 | 17/08/2016      | 75019       | E       | 90                    | female | no           | 08/08/2016        | T1245     | negative      | 1               |
| 229 | 2398 | 17/08/2016      | 94500       | D       | 164                   | NA     | no           | 08/08/2016        | T1242     | negative      | 3               |
| 230 | 2399 | 17/10/2016      | 95100       | R       | 749                   | male   | no           | 08/08/2016        | T1243     | negative      | 4               |
| 231 | 2400 | 17/10/2016      | 95100       | D       | NA                    | NA     | no           | 08/08/2016        | T1244     | negative      | 1               |
| 232 | 2416 | 17/10/2016      | 75020       | D       | NA                    | NA     | no           | 10/08/2016        | T1254     | positive      | 1               |
| 233 | 2417 | 18/04/2016      | 94380       | D       | 454                   | male   | no           | 10/08/2016        | T1256     | positive      | 1               |
| 234 | 2418 | 18/05/2016      | 94400       | D       | 510                   | male   | yes          | 10/08/2016        | T1262     | negative      | 1               |
| 235 | 2442 | 18/05/2016      | 91330       | E       | adult                 | female | no           | 12/08/2016        | T1341     | negative      | 3               |
| 236 | 2444 | 18/06/2016      | 92350       | R       | 95                    | NA     | no           | 12/08/2016        | T1367     | negative      | 1               |
| 237 | 2452 | 18/07/2016      | 28500       | E       | 95                    | NA     | no           | 15/08/2016        | T1421     | negative      | 1               |
| 238 | 2453 | 18/07/2016      | 78150       | D       | 224                   | male   | no           | 13/08/2016        | T1356     | negative      | 3               |
| 239 | 2454 | 18/07/2016      | 94130       | D       | NA                    | NA     | no           | 13/08/2016        | T1398     | negative      | 2               |
| 240 | 2459 | 18/09/2016      | 91380       | E       | 268                   | NA     | no           | 13/08/2016        | T1365     | negative      | 1               |
| 241 | 2460 | 18/09/2016      | 95480       | D       | BB                    | NA     | no           | 13/08/2016        | T1400     | negative      | 1               |
| 242 | 2461 | 18/09/2016      | 95480       | D       | BB                    | NA     | no           | 13/08/2016        | T1399     | negative      | 1               |
| 243 | 2462 | 18/10/2016      | NA          | NA      | 148                   | male   | no           | 13/08/2016        | T1401     | negative      | 1               |
| 244 | 2475 | 18/10/2016      | NA          | NA      | 260                   | male   | no           | 15/08/2016        | T1402     | negative      | 1               |
| 245 | 2476 | 18/10/2016      | NA          | D       | 270                   | female | no           | 15/08/2016        | T1403     | negative      | 1               |
| 246 | 2477 | 18/10/2016      | 94290       | D       | adult                 | female | no           | 15/08/2016        | T1404     | negative      | 1               |
| 247 | 2487 | 18/12/2016      | 92160       | NA      | 385                   | female | no           | 16/08/2016        | T1371     | negative      | 1               |
| 248 | 2492 | 18/12/2016      | 77400       | NA      | 428                   | female | no           | 17/08/2016        | T1415     | positive      | 1               |
| 249 | 2496 | 19/04/2016      | 92160       | E       | 549                   | male   | no           | 17/08/2016        | T1418     | positive      | 1               |
| 250 | 2515 | 19/06/2016      | 94170       | E       | 113                   | NA     | no           | 19/08/2016        | T1416     | negative      | 1               |
| 251 | 2516 | 19/06/2016      | 92190       | D       | 124                   | male   | no           | 19/08/2016        | T1417     | positive      | 1               |
| 252 | 2524 | 19/06/2016      | 92190       | E       | 125                   | male   | no           | 20/08/2016        | T1390     | negative      | 1               |
| 253 | 2527 | 19/06/2016      | 77220       | D       | 147                   | male   | yes          | 20/08/2016        | T1389     | negative      | 1               |
| 254 | 2534 | 19/06/2016      | 92190       | R       | 149                   | male   | no           | 21/08/2016        | T1351     | positive      | 4               |
| 255 | 2535 | 19/06/2016      | 77178       | D       | 460                   | NA     | no           | 21/08/2016        | T1340     | positive      | 6               |
| 256 | 2536 | 19/06/2016      | 60500       | D       | 550                   | NA     | no           | 21/08/2016        | T1350     | positive      | 4               |
| 257 | 2543 | 19/06/2016      | 95170       | R       | 686                   | female | no           | 21/08/2016        | T1387     | negative      | 1               |
| 258 | 2565 | 19/08/2016      | 91400       | D       | 577                   | female | no           | 23/08/2016        | T1383     | negative      | 1               |
| 259 | 2566 | 19/08/2016      | 94000       | E       | NA                    | female | no           | 23/08/2016        | T1409     | negative      | 1               |
| 260 | 2567 | 20/06/2016      | 94420       | D       | 460                   | male   | no           | 23/08/2016        | T1384     | negative      | 1               |

| N°  | ID   | Date of arrival | Postal code | Outcome | Weight at arrival (g) | Sex    | Skin lesions | 1st sampling date | Sample ID | 1st diagnosis | N° of samplings |
|-----|------|-----------------|-------------|---------|-----------------------|--------|--------------|-------------------|-----------|---------------|-----------------|
| 261 | 2572 | 20/06/2016      | 60330       | D       | 600                   | female | no           | 24/08/2016        | T1412     | negative      | 1               |
| 262 | 2580 | 20/07/2016      | 94500       | D       | 101                   | male   | no           | 24/08/2016        | T1353     | negative      | 2               |
| 263 | 2581 | 20/07/2016      | 94410       | R       | 403                   | male   | no           | 24/08/2016        | T1352     | negative      | 1               |
| 264 | 2598 | 20/08/2016      | 78180       | E       | 50                    | NA     | no           | 26/08/2016        | T1411     | positive      | 3               |
| 265 | 2599 | 20/08/2016      | 91700       | D       | 880                   | female | no           | 26/08/2016        | T1363     | negative      | 1               |
| 266 | 2600 | 20/09/2016      | 75016       | D       | NA                    | female | no           | 26/08/2016        | T1408     | negative      | 6               |
| 267 | 2601 | 20/11/2016      | 95180       | NA      | 290                   | male   | no           | 26/08/2016        | T1346     | negative      | 1               |
| 268 | 2602 | 20/11/2016      | 91540       | D       | 393                   | female | no           | 26/08/2016        | T1347     | negative      | 1               |
| 269 | 2638 | 20/11/2016      | 77330       |         | 539                   | female | no           | 29/08/2016        | T1326     | positive      | 1               |
| 270 | 2639 | 21/05/2016      | 94440       | R       | 1400                  | female | no           | 29/08/2016        | T1325     | positive      | 4               |
| 271 | 2642 | 21/06/2016      | 94290       | R       | 101                   | NA     | no           | 29/08/2016        | T1379     | positive      | 4               |
| 272 | 2647 | 21/07/2016      | 78740       | D       | 85                    | female | no           | 31/08/2016        | T1377     | positive      | 1               |
| 273 | 2649 | 21/07/2016      | 78740       | E       | 103                   | male   | yes          | 31/08/2016        | T1378     | negative      | 2               |
| 274 | 2650 | 21/07/2016      | 77590       | D       | NA                    | male   | no           | 30/08/2016        | T1424     | negative      | 1               |
| 275 | 2678 | 21/08/2016      | 95410       | NA      | 151                   | NA     | no           | 01/09/2016        | T1344     | negative      | 2               |
| 276 | 2688 | 21/08/2016      | 95410       | NA      | 156                   | NA     | no           | 02/09/2016        | T1345     | negative      | 1               |
| 277 | 2695 | 21/08/2016      | 95410       | NA      | 162                   | female | no           | 02/09/2016        | T1462     | negative      | 1               |
| 278 | 2700 | 21/08/2016      | 91200       | D       | 247                   | NA     | yes          | 03/09/2016        | T1349     | positive      | 1               |
| 279 | 2702 | 21/09/2016      | 94160       | E       | 291                   | female | no           | 03/09/2016        | T1339     | positive      | 1               |
| 280 | 2703 | 21/09/2016      | 77184       | D       | 294                   | NA     | no           | 03/09/2016        | T1337     | positive      | 5               |
| 281 | 2704 | 21/09/2016      | 93330       | NA      | 296                   | male   | no           | 03/09/2016        | T1426     | positive      | 4               |
| 282 | 2705 | 21/09/2016      | 94320       | R       | 582                   | NA     | no           | 03/09/2016        | T1364     | negative      | 3               |
| 283 | 2711 | 21/11/2016      | 78330       | D       | 222                   | female | no           | 03/09/2016        | T1405     | positive      | 1               |
| 284 | 2729 | 21/11/2016      | 60500       | D       | 366                   | male   | no           | 04/09/2016        | T1459     | negative      | 1               |
| 285 | 2735 | 22/04/2016      | 94550       | R       | 544                   | female | no           | 05/09/2016        | T1458     | positive      | 1               |
| 286 | 2736 | 22/05/2016      | 94320       | E       | 409                   | male   | no           | 05/09/2016        | T1457     | negative      | 1               |
| 287 | 2750 | 22/06/2016      | 94700       | D       | NA                    | NA     | no           | 06/09/2016        | T1464     | negative      | 1               |
| 288 | 2752 | 22/06/2016      | 92000       | D       | NA                    | NA     | no           | 06/09/2016        | T1463     | negative      | 1               |
| 289 | 2778 | 22/10/2016      | 94190       | R       | 958                   | male   | no           | 08/09/2016        | T1456     | negative      | 3               |
| 290 | 2781 | 22/10/2016      | 94250       | E       | adult                 | female | no           | 09/09/2016        | T1455     | negative      | 1               |
| 291 | 2783 | 22/11/2016      | 94500       | E       | 214                   | male   | yes          | 09/09/2016        | T1454     | negative      | 1               |
| 292 | 2799 | 23/04/2016      | 94450       | R       | 689                   | male   | no           | 10/09/2016        | T1453     | negative      | 1               |
| 293 | 2817 | 23/06/2016      | 78350       | D       | 96                    | male   | no           | 11/09/2016        | T1451     | positive      | 4               |
| 294 | 2818 | 23/06/2016      | 78350       | D       | 103                   | male   | no           | 11/09/2016        | T1452     | positive      | 1               |
| 295 | 2824 | 23/06/2016      | 95190       | R       | 133                   | male   | no           | 12/09/2016        | T1448     | negative      | 3               |
| 296 | 2825 | 23/06/2016      | 91790       | E       | 517                   | male   | no           | 12/09/2016        | T1449     | negative      | 1               |
| 297 | 2826 | 23/06/2016      | 94430       | D       | 599                   | male   | no           | 12/09/2016        | T1450     | negative      | 2               |
| 298 | 2839 | 23/08/2016      | 78350       | E       | 91                    | male   | no           | 14/09/2016        | T1489     | negative      | 1               |
| 299 | 2840 | 23/08/2016      | 78350       | E       | 95                    | male   | no           | 15/09/2016        | T1488     | negative      | 4               |
| 300 | 2841 | 23/08/2016      | 78350       | E       | 97                    | female | no           | 14/09/2016        | T1490     | negative      | 1               |
| 301 | 2874 | 23/11/2016      | 94700       | D       | 443                   | female | no           | 15/09/2016        | T1502     | negative      | 2               |
| 302 | 2881 | 24/05/2016      | 94130       | R       | 540                   | female | no           | 16/09/2016        | T1503     | negative      | 1               |
| 303 | 2895 | 24/06/2016      | 78860       | D       | 96                    | male   | no           | 18/09/2016        | T1507     | negative      | 1               |
| 304 | 2896 | 24/06/2016      | 93700       | R       | 99                    | male   | no           | 18/09/2016        | T1501     | positive      | 1               |

| N°  | ID   | Date of arrival | Postal code | Outcome | Weight at arrival (g) | Sex    | Skin lesions | 1st sampling date | Sample ID | 1st diagnosis | N° of samplings |
|-----|------|-----------------|-------------|---------|-----------------------|--------|--------------|-------------------|-----------|---------------|-----------------|
| 305 | 2897 | 24/06/2016      | 95100       | R       | 100                   | male   | no           | 18/09/2016        | T1501b    | negative      | 1               |
| 306 | 2914 | 24/06/2016      | 93700       | R       | 101                   | male   | no           | 20/09/2016        | T1538     | negative      | 1               |
| 307 | 2915 | 24/06/2016      | 95100       | R       | 107                   | female | no           | 21/09/2016        | T1572     | negative      | 1               |
| 308 | 2919 | 24/06/2016      | 94800       | E       | 107                   | male   | no           | 21/09/2016        | T1571     | positive      | 1               |
| 309 | 2921 | 24/06/2016      | 93700       | R       | 110                   | male   | no           | 21/09/2016        | T1570     | negative      | 3               |
| 310 | 2925 | 24/06/2016      | 28700       | D       | 488                   | male   | no           | 21/09/2016        | T1568     | negative      | 1               |
| 311 | 2961 | 24/06/2016      | 92700       | R       | 524                   | male   | no           | 25/09/2016        | T1579     | negative      | 2               |
| 312 | 2974 | 24/06/2016      | 95100       | R       | 875                   | male   | yes          | 26/09/2016        | T1638     | negative      | 1               |
| 313 | 3004 | 24/08/2016      | 77450       | D       | 200                   | female | no           | 30/09/2016        | T1640     | negative      | 1               |
| 314 | 3006 | 24/08/2016      | 77450       | D       | 200                   | female | no           | 30/09/2016        | T1636     | negative      | 1               |
| 315 | 3019 | 24/08/2016      | 93250       | D       | 623                   | female | no           | 02/10/2016        | T1637     | negative      | 3               |
| 316 | 3024 | 24/10/2016      | 77860       | R       | 172                   | male   | no           | 02/10/2016        | T1668     | negative      | 1               |
| 317 | 3026 | 24/10/2016      | 60500       | D       | 414                   | male   | no           | 03/10/2016        | T1667     | positive      | 5               |
| 318 | 3032 | 25/10/2016      | 28290       | D       | 358                   | male   | no           | 04/10/2016        | T1669     | positive      | 1               |
| 319 | 3043 | 25/03/2016      | 77176       | R       | 750                   | female | yes          | 05/10/2016        | T1681     | negative      | 1               |
| 320 | 3050 | 25/04/2016      | 94500       | R       | 700                   | male   | yes          | 07/10/2016        | T1682     | negative      | 1               |
| 321 | 3054 | 25/05/2016      | 92370       | R       | 770                   | female | no           | 07/10/2016        | T1670     | positive      | 3               |
| 322 | 3062 | 25/06/2016      | 60240       | D       | 80                    | male   | no           | 09/10/2016        | T1680     | positive      | 1               |
| 323 | 3063 | 25/06/2016      | 60240       | D       | 90                    | male   | no           | 09/10/2016        | T1666     | negative      | 3               |
| 324 | 3067 | 25/06/2016      | 60240       | R       | 125                   | female | no           | 09/10/2016        | T1679     | negative      | 1               |
| 325 | 3068 | 25/06/2016      | 95500       | D       | 496                   | NA     | no           | 09/10/2016        | T1678     | negative      | 1               |
| 326 | 3071 | 25/07/2016      | NA          | R       | 430                   | female | no           | 09/10/2016        | T1677     | negative      | 1               |
| 327 | 3080 | 25/07/2016      | NA          | D       | 430                   | male   | no           | 10/10/2016        | T1743     | negative      | 1               |
| 328 | 3081 | 25/07/2016      | 78140       | R       | 445                   | female | no           | 10/10/2016        | T1751     | negative      | 2               |
| 329 | 3082 | 25/07/2016      | NA          | R       | 532                   | male   | no           | 10/10/2016        | T1741     | negative      | 2               |
| 330 | 3083 | 25/07/2016      | 93340       | R       | 694                   | male   | no           | 10/10/2016        | T1675     | negative      | 3               |
| 331 | 3090 | 25/08/2016      | 91600       | NA      | 76                    | female | no           | 11/10/2016        | T1676     | negative      | 1               |
| 332 | 3092 | 25/09/2016      | 95230       | NA      | 163                   | female | no           | 11/10/2016        | T1760     | negative      | 1               |
| 333 | 3095 | 26/04/2016      | 94100       | D       | 579                   | female | yes          | 12/10/2016        | T1744     | negative      | 1               |
| 334 | 3097 | 26/06/2016      | 78700       | R       | 85                    | female | no           | 12/10/2016        | T1771     | negative      | 1               |
| 335 | 3100 | 26/06/2016      | 92250       | R       | 102                   | female | no           | 12/10/2016        | T1742     | positive      | 3               |
| 336 | 3101 | 26/06/2016      | 91090       | R       | 109                   | female | no           | 12/10/2016        | T1770     | negative      | 1               |
| 337 | 3103 | 26/06/2016      | NA          | D       | 110                   | male   | no           | 13/10/2016        | T1740     | negative      | 3               |
| 338 | 3107 | 26/06/2016      | 95150       | R       | 113                   | male   | no           | 13/10/2016        | T1745     | negative      | 2               |
| 339 | 3109 | 26/06/2016      | NA          | D       | 159                   | NA     | no           | 13/10/2016        | T1746     | negative      | 1               |
| 340 | 3116 | 26/06/2016      | 94520       | R       | 759                   | female | no           | 14/10/2016        | T1755     | negative      | 1               |
| 341 | 3129 | 26/06/2016      | 77420       | E       | 114                   | male   | no           | 16/10/2016        | T1747     | negative      | 1               |
| 342 | 3133 | 26/06/2016      | 78700       | D       | NA                    | female | no           | 16/10/2016        | T1739     | negative      | 1               |
| 343 | 3135 | 26/06/2016      | 93000       | E       | 546                   | NA     | no           | 16/10/2016        | T1748     | negative      | 1               |
| 344 | 3136 | 26/07/2016      | 78500       | D       | 65                    | male   | no           | 16/10/2016        | T1749     | negative      | 1               |
| 345 | 3144 | 26/07/2016      | 78500       | D       | 70                    | male   | no           | 17/10/2016        | T1750     | negative      | 2               |
| 346 | 3147 | 26/07/2016      | 92330       | D       | NA                    | NA     | no           | 17/10/2016        | T1761     | negative      | 1               |
| 347 | 3150 | 26/08/2016      | 91600       | D       | 66                    | female | no           | 17/10/2016        | T1759     | negative      | 1               |
| 348 | 3155 | 26/08/2016      | 91600       | NA      | 80                    | male   | no           | 18/10/2016        | T1758     | negative      | 1               |



| N°  | ID   | Date of arrival | Postal code | Outcome | Weight at arrival (g) | Sex    | Skin lesions | 1st sampling date | Sample ID | 1st diagnosis | N° of samplings |
|-----|------|-----------------|-------------|---------|-----------------------|--------|--------------|-------------------|-----------|---------------|-----------------|
| 349 | 3156 | 26/08/2016      | 94140       | D       | 790                   | male   | no           | 18/10/2016        | T1738     | negative      | 1               |
| 350 | 3157 | 26/08/2016      | 94140       | E       | 840                   | male   | no           | 18/10/2016        | T1737     | negative      | 3               |
| 351 | 3158 | 26/09/2016      | 92380       | E       | 111                   | NA     | no           | 18/10/2016        | T1736     | negative      | 3               |
| 352 | 3182 | 27/06/2016      | 95740       | D       | 40                    | male   | no           | 22/10/2016        | T1883     | negative      | 1               |
| 353 | 3185 | 27/06/2016      | 77220       | D       | 150                   | female | no           | 22/10/2016        | T1839     | negative      | 1               |
| 354 | 3189 | 27/06/2016      | 77220       | D       | 165                   | female | no           | 24/10/2016        | T1841     | negative      | 1               |
| 355 | 3193 | 27/06/2016      | 77220       | D       | 170                   | female | no           | 24/10/2016        | T1840     | negative      | 2               |
| 356 | 3212 | 27/06/2016      | 77220       | R       | 191                   | female | no           | 27/10/2016        | T1837     | negative      | 1               |
| 357 | 3213 | 27/06/2016      | 27700       | E       | 575                   | female | no           | 27/10/2016        | T1834     | negative      | 3               |
| 358 | 3214 | 27/06/2016      | 94160       | E       | 602                   | NA     | no           | 27/10/2016        | T1838     | positive      | 2               |
| 359 | 3216 | 27/07/2016      | 92190       | R       | 312                   | female | no           | 27/10/2016        | T1884     | negative      | 1               |
| 360 | 3222 | 27/07/2016      | NA          | D       | 650                   | female | no           | 28/10/2016        | T1835     | negative      | 1               |
| 361 | 3223 | 27/07/2016      | 78510       | D       | 960                   | male   | no           | 28/10/2016        | T1836     | negative      | 2               |
| 362 | 3224 | 27/07/2016      | 92370       | D       | adult                 | NA     | no           | 28/10/2016        | T1882     | negative      | 1               |
| 363 | 3228 | 27/07/2016      | 78320       | D       | 260                   | NA     | no           | 29/10/2016        | T1833     | negative      | 1               |
| 364 | 3253 | 27/10/2016      | 95270       | D       | 210                   | female | no           | 02/11/2016        | T1865     | negative      | 1               |
| 365 | 3258 | 27/10/2016      | 95270       | NA      | 264                   | male   | no           | 28/10/2016        | T1877     | negative      | 1               |
| 366 | 3267 | 27/10/2016      | 77000       | E       | 323                   | female | no           | 04/11/2016        | T1867     | negative      | 2               |
| 367 | 3268 | 27/10/2016      | 95270       | NA      | 340                   | female | no           | 04/11/2016        | T1868     | negative      | 2               |
| 368 | 3269 | 28/04/2016      | 95170       | E       | 589                   | male   | no           | 04/11/2016        | T1873     | negative      | 1               |
| 369 | 3271 | 28/05/2016      | 91180       | E       | adult                 | female | no           | 04/11/2016        | T1866     | negative      | 1               |
| 370 | 3283 | 28/07/2016      | 77000       | D       | 208                   | female | no           | 06/11/2016        | T1930     | negative      | 2               |
| 371 | 3284 | 28/10/2016      | 93200       | D       | 188                   | NA     | no           | 06/11/2016        | T1942     | negative      | 1               |
| 372 | 3287 | 28/10/2016      | 94100       | D       | 197                   | female | no           | 07/11/2016        | T1929     | positive      | 1               |
| 373 | 3290 | 28/10/2016      | 94100       | NA      | 221                   | male   | no           | 08/11/2017        | T1941     | negative      | 1               |
| 374 | 3304 | 28/11/2016      | 60230       | D       | 147                   | female | no           | 11/11/2016        | T1963     | negative      | 1               |
| 375 | 3306 | 28/11/2016      | 93290       | NA      | 559                   | male   | no           | 12/11/2016        | T1965     | negative      | 1               |
| 376 | 3310 | 28/11/2016      | 94420       | D       | juvenile              | male   | no           | 12/11/2016        | T1964     | negative      | 2               |
| 377 | 3317 | 29/03/2016      | NA          | R       | 503                   | female | no           | 13/11/2016        | T1962     | negative      | 1               |
| 378 | 3326 | 29/04/2016      | 92600       | D       | 428                   | female | no           | 15/11/2016        | T1966     | negative      | 1               |
| 379 | 3328 | 29/04/2016      | 77122       | D       | 544                   | male   | yes          | 16/11/2016        | T1969     | positive      | 5               |
| 380 | 3330 | 29/06/2016      | 95520       | E       | 93                    | male   | no           | 16/11/2016        | T1968     | positive      | 1               |
| 381 | 3332 | 29/06/2016      | NA          | R       | 542                   | male   | no           | 16/11/2016        | T1961     | positive      | 1               |
| 382 | 3347 | 29/06/2016      | 95800       | D       | 580                   | male   | yes          | 20/11/2016        | T1999     | positive      | 2               |
| 383 | 3348 | 29/06/2016      | NA          | R       | 592                   | female | no           | 20/11/2016        | T1998     | positive      | 3               |
| 384 | 3352 | 29/08/2016      | 91600       | NA      | 63                    | male   | no           | 20/11/2016        | T1997     | positive      | 1               |
| 385 | 3353 | 29/08/2016      | 95210       | D       | 95                    | female | yes          | 21/11/2016        | T2008     | positive      | 2               |
| 386 | 3357 | 29/08/2016      | 95210       |         | 138                   | male   | yes          | 21/11/2016        | T2009     | negative      | 1               |
| 387 | 3359 | 29/10/2016      | 91420       | D       | 632                   | male   | no           | 22/11/2016        | T2153     | positive      | 1               |
| 388 | 3361 | 29/11/2016      | 78570       | D       | 305                   | female | no           | 23/11/2016        | T2152     | negative      | 1               |
| 389 | 3380 | 30/03/2016      | 95420       | R       | 974                   | male   | no           | 28/11/2016        | T2099     | negative      | 1               |
| 390 | 3381 | 30/06/2016      | NA          | D       | 37                    | NA     | no           | 28/11/2016        | T2151     | negative      | 1               |
| 391 | 3385 | 30/06/2016      | NA          | D       | 44                    | NA     | no           | 28/11/2016        | T2098     | negative      | 1               |
| 392 | 3391 | 30/06/2016      | NA          | D       | 47                    | NA     | no           | 29/11/2016        | T2097     | negative      | 1               |

| N°  | ID          | Date of arrival | Postal code | Outcome | Weight at arrival (g) | Sex    | Skin lesions | 1st sampling date | Sample ID | 1st diagnosis | N° of samplings |
|-----|-------------|-----------------|-------------|---------|-----------------------|--------|--------------|-------------------|-----------|---------------|-----------------|
| 393 | <b>3397</b> | 30/06/2016      | NA          | D       | 49                    | NA     | no           | 30/11/2016        | T2096     | positive      | 3               |
| 394 | <b>3398</b> | 30/06/2016      | 72340       | D       | 63                    | NA     | no           | 30/11/2016        | T2094     | positive      | 3               |
| 395 | <b>3399</b> | 30/06/2016      | 91140       | R       | 1095                  | male   | no           | 30/11/2016        | T2093     | negative      | 1               |
| 396 | <b>3404</b> | 30/07/2016      | 60660       | R       | 92                    | NA     | no           | 01/12/2016        | T2092     | negative      | 1               |
| 397 | <b>3408</b> | 30/07/2016      | 60660       | R       | 94                    | male   | no           | 02/12/2016        | T2150     | negative      | 1               |
| 398 | <b>3409</b> | 30/07/2016      | 60660       | NA      | 97                    | female | no           | 03/12/2016        | T2091     | negative      | 1               |
| 399 | <b>3414</b> | 30/07/2016      | 60660       | R       | 98                    | female | no           | 03/12/2016        | T2090     | negative      | 1               |
| 400 | <b>3415</b> | 30/07/2016      | 94700       | D       | 328                   | NA     | no           | 04/12/2016        | T2089     | positive      | 1               |
| 401 | <b>3419</b> | 30/08/2016      | 95320       | D       | 45                    | male   | no           | 06/12/2016        | T2095     | negative      | 1               |
| 402 | <b>3420</b> | 30/08/2016      | 95320       | R       | 48                    | female | no           | 06/12/2016        | T2154     | negative      | 1               |
| 403 | <b>3421</b> | 30/08/2016      | 94130       | R       | 380                   | NA     | no           | 06/12/2016        | T2088     | negative      | 1               |
| 404 | <b>3435</b> | 30/09/2016      | 94200       | D       | 119                   | NA     | no           | 09/12/2016        | T2148     | negative      | 1               |
| 405 | <b>3436</b> | 30/09/2016      | 95140       | E       | 216                   | NA     | no           | 09/12/2016        | T2149     | negative      | 1               |
| 406 | <b>3437</b> | 30/11/2016      | 95390       | NA      | 229                   | male   | no           | 09/12/2016        | T2147     | negative      | 1               |
| 407 | <b>3440</b> | 30/11/2016      | 95390       | NA      | 288                   | female | yes          | 10/12/2016        | T2146     | positive      | 1               |
| 408 | <b>3442</b> | 30/11/2016      | 95110       | R       | NA                    | male   | yes          | 10/12/2016        | T2145     | negative      | 1               |
| 409 | <b>3444</b> | 31/05/2016      | 78280       | D       | 464                   | male   | no           | 11/12/2016        | T2144     | negative      | 1               |
| 410 | <b>3452</b> | 31/07/2016      | 91700       | R       | 650                   | male   | no           | 15/12/2016        | T2188     | negative      | 1               |
| 411 | <b>3458</b> | 31/07/2016      | 94000       | E       | 895                   | male   | no           | 18/12/2016        | T2189     | negative      | 1               |
| 412 | <b>3460</b> | 31/07/2016      | 94700       | R       | 1100                  | female | yes          | 18/12/2016        | T2190     | positive      | 2               |
